# Supplementary material
Source: publisher site journal article supplement (https://www.dovepress.com/article/587614)

**Supplementary Information**

Fig. S1. XPS analysis of Mn-Fe-Dox-BSA-MoS2 nanoflowers.

Fig. S2. Nitrogen-sorption isotherms for BSA-MoS2 nanoflowers.

Fig. S3. Nitrogen-sorption isotherms for Mn-Fe-Dox-BSA-MoS2 nanoflowers.

Fig. S4. Statistical analysis of apoptosis in MB49 cells under different treatments. Compared to the control group, * indicates *p* < 0.05, *** indicates *p* < 0.001. DMNP: Dox-BSA-MoS2 nanoflowers; MFDMNP: Mn-Fe-Dox-BSA-MoS2 nanoflowers.

Fig. S5. Photoacoustic signal intensity in tumor regions at various time points post nanoflowers injection.

Fig. S6. Final tumor volume measurements across experimental groups prior to euthanasia. (DMNP: Dox-BSA-MoS2 nanoflowers; MFDMNP: Mn-Fe-Dox-BSA-MoS2 nanoflowers). Compared to the control group, * indicates *p* < 0.05, ** indicates *p* < 0.01, *** indicates *p* < 0.001.


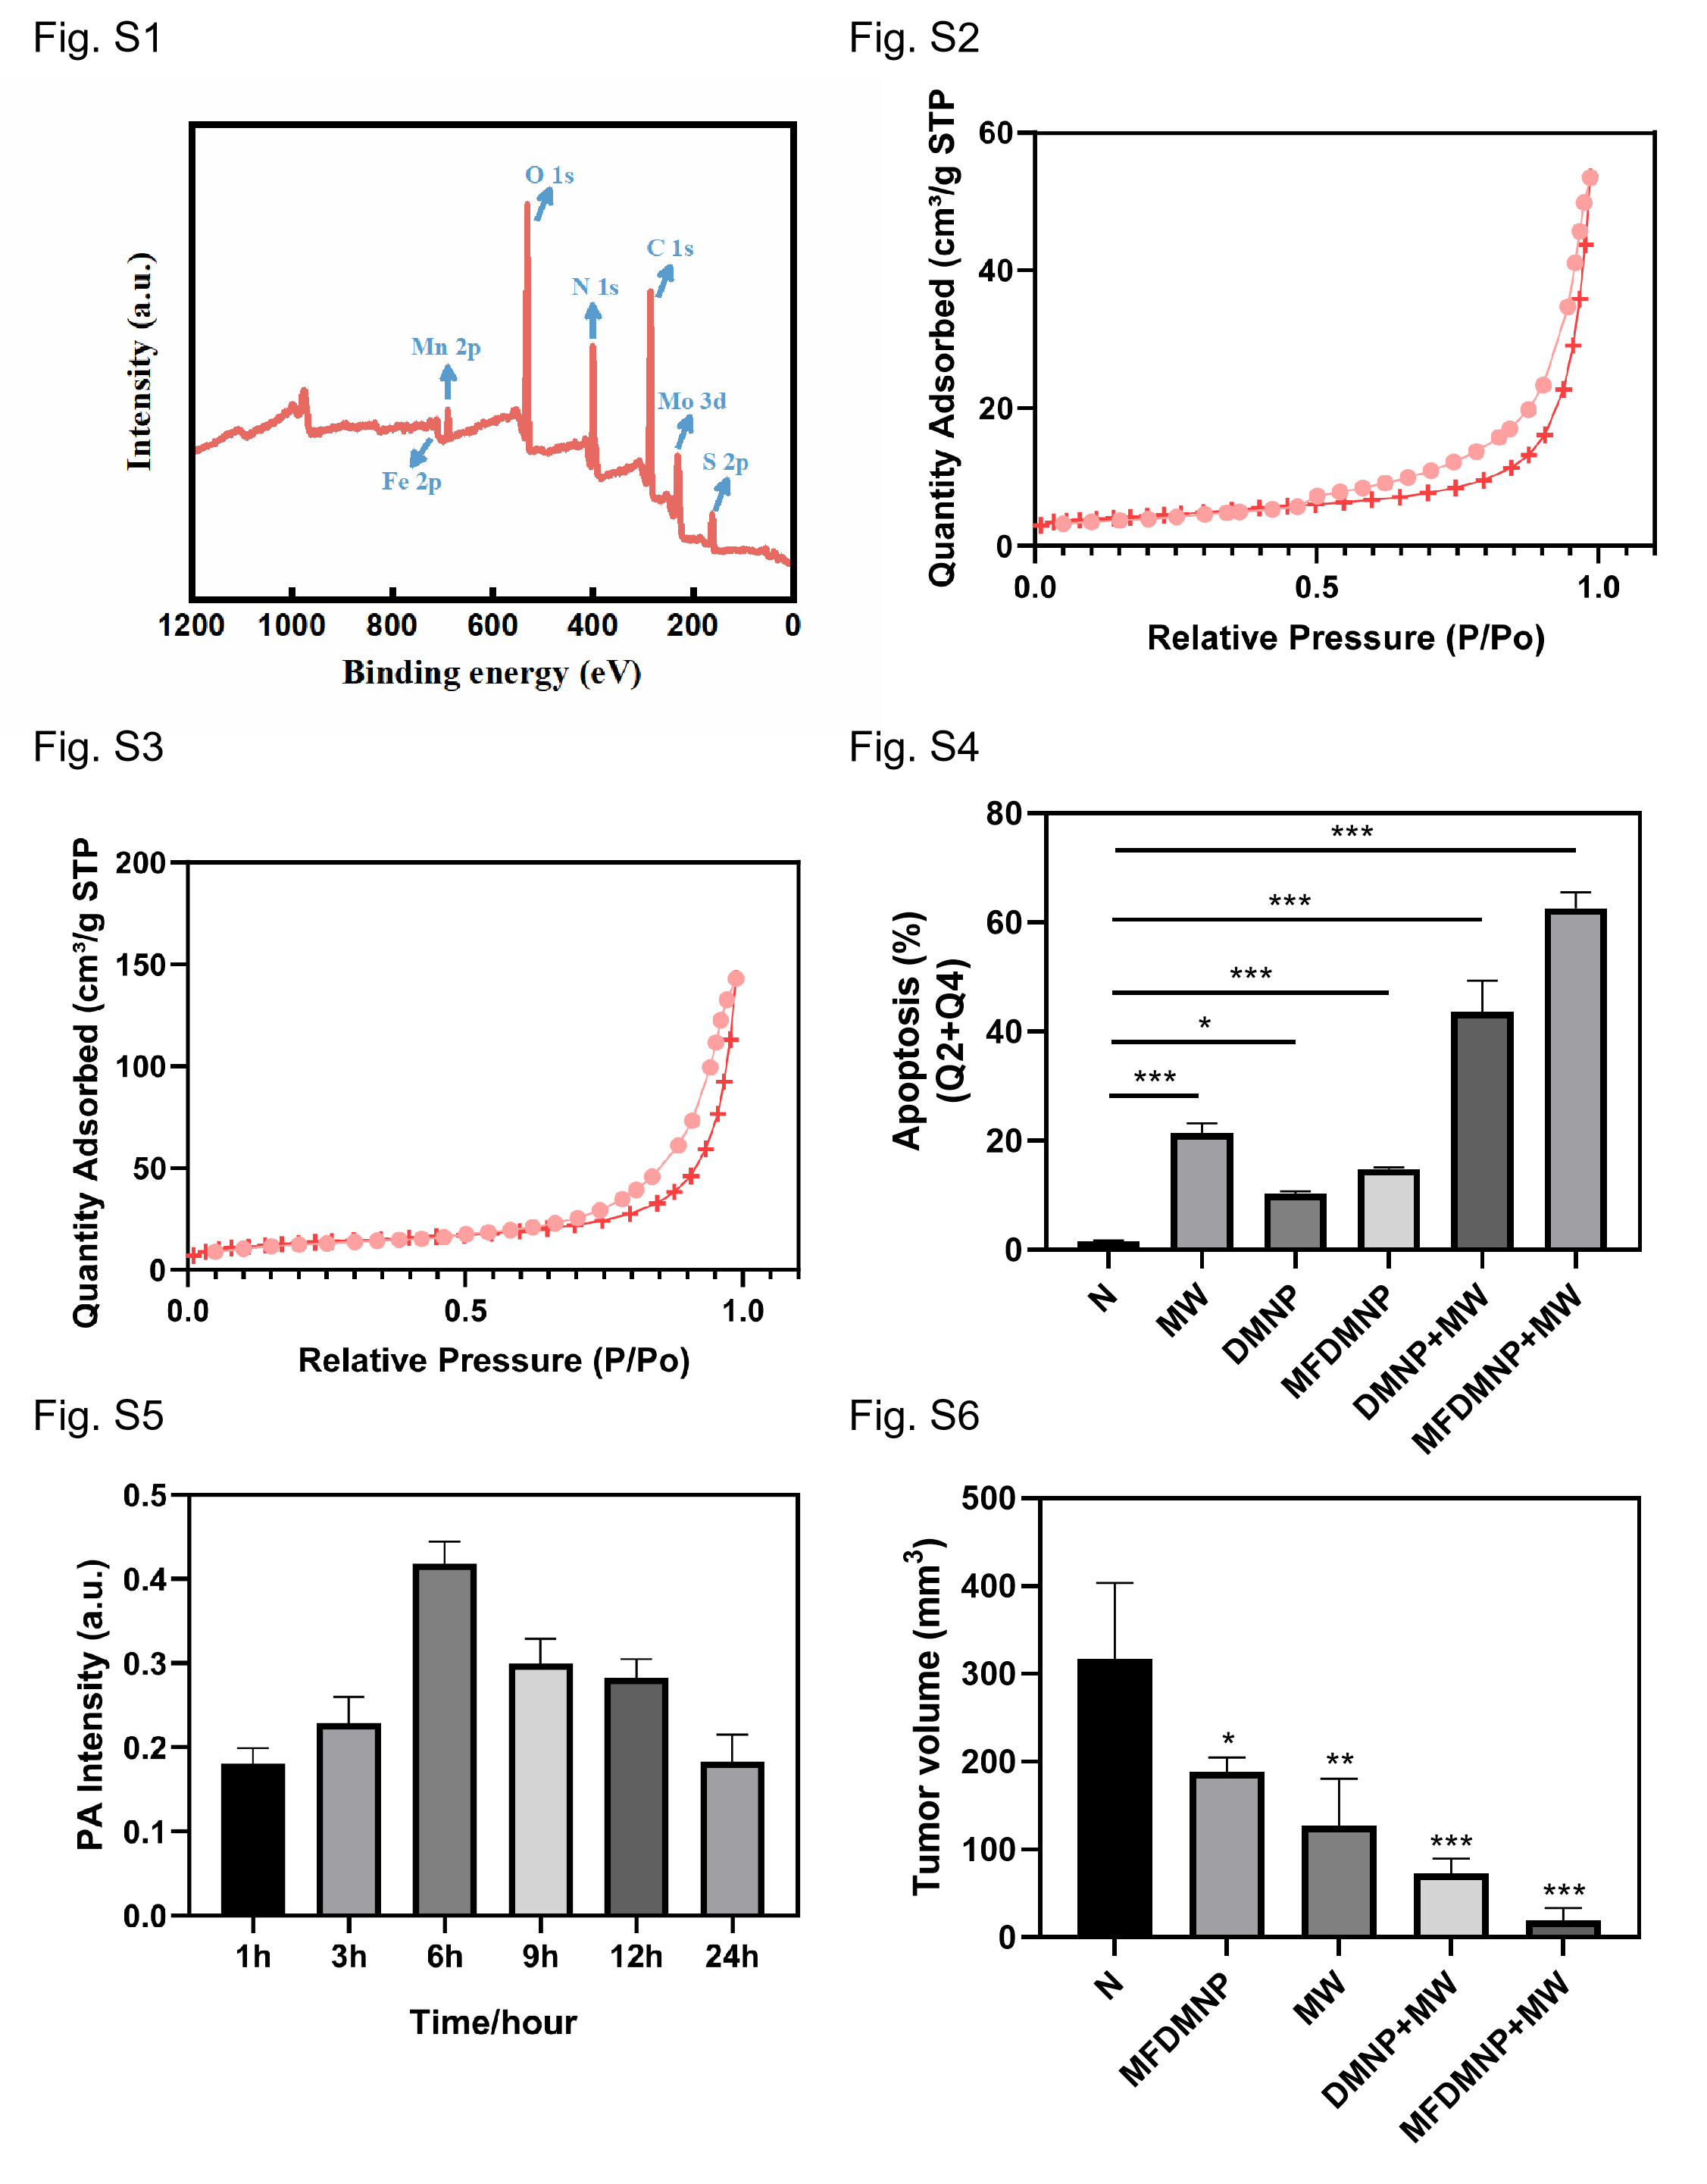

Supplement: Supplementary file 1 [file 587614%20Supporting%20Information.docx]
